# Supplementary material for: Assisted Reproductive Technology and Breech Delivery: A Nationwide Cohort Study in Singleton Pregnancies
Source: MDPI journal article supplement (doi:10.3390/jpm13071144), 2023-07-16

**Figure S1-** This plot shows the proportion of CD (yearly prevalence) in singleton pregnancies after OST, ART, and SC according to cephalic and breech presentation.

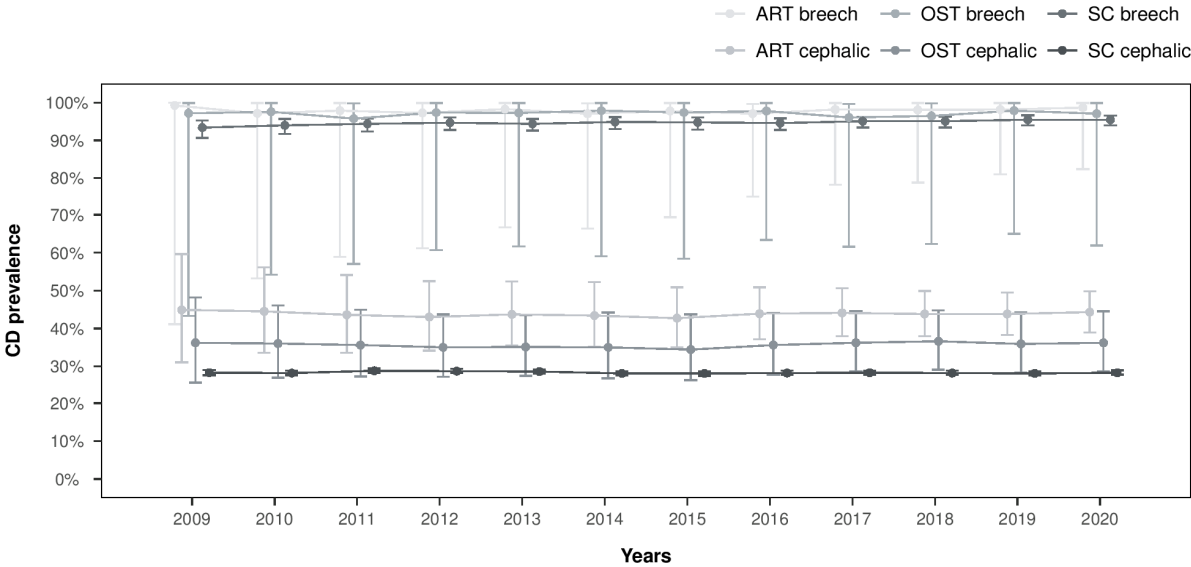

Supplement: s1 [file s1]
