# Supplementary material for: Assisted Reproductive Technology and Breech Delivery: A Nationwide Cohort Study in Singleton Pregnancies
Source: MDPI journal article supplement (doi:10.3390/jpm13071144), 2023-07-16
Supplement: s1 [file s1]

**Table S1-** This table shows the complete multivariate logistic regression analysis (including interaction terms) that considers breech presentation at delivery as the dependent variable and the possible known risk factors as independent variables.

|                                                     | OR (CI.95)(¶)      | p(¶)   |
|-----------------------------------------------------|--------------------|--------|
| Factors associated with breech                      |                    |        |
| Maternal age >33 years                              | 1.39 (1.38 - 1.41) | <0.001 |
| Nulliparity                                         | 1.79 (1.78 - 1.81) | <0.001 |
| Black (only) race                                   | 0.75 (0.74 - 0.76) | <0.001 |
| Hispanic origin                                     | 0.81 (0.8 - 0.82)  | <0.001 |
| Tobacco smoke                                       | 1.18 (1.16 - 1.2)  | <0.001 |
| Previous CD                                         | 1.53 (1.51 - 1.55) | <0.001 |
| Neonatal female sex                                 | 1.2 (1.19 - 1.21)  | <0.001 |
| Gestational age >40 weeks                           | 0.41 (0.4 - 0.42)  | <0.001 |
| Birth weight (MoM)                                  |                    |        |
| 0.9-1.07 MoM                                        |                    |        |
| <0.9 MoM                                            | 1.47 (1.46 - 1.49) | <0.001 |
| >1.07 MoM                                           | 1.06 (1.05 - 1.07) | <0.001 |
| OST                                                 | 1.79 (1.71 - 1.87) | <0.001 |
| ART                                                 | 2.32 (2.23 - 2.41) | <0.001 |
| Maternal age >33 years:Nulliparity                  | 1.14 (1.13 - 1.15) | <0.001 |
| Maternal age >33 years:Black (only) race            | 1.34 (1.32 - 1.36) | <0.001 |
| Maternal age >33 years:Hispanic origin              | 1.22 (1.21 - 1.23) | <0.001 |
| Maternal age >33 years:Tobacco smoke                | 1.12 (1.09 - 1.14) | <0.001 |
| Maternal age >33 years:Neonatal female sex          | 0.95 (0.94 - 0.96) | <0.001 |
| Maternal age >33 years:Gestational age >40 weeks    | 0.94 (0.93 - 0.96) | <0.001 |
| Maternal age >33 years:Birth weight (MoM) <0.9 MoM  | 1 (0.99 - 1.01)    | 0.798  |
| Maternal age >33 years:Birth weight (MoM) >1.07 MoM | 0.98 (0.97 - 1)    | 0.006  |
| Maternal age >33 years:OST                          | 0.87 (0.83 - 0.91) | <0.001 |
| Maternal age >33 years:ART                          | 0.85 (0.81 - 0.88) | <0.001 |
| Nulliparity:Black (only) race                       | 0.72 (0.71 - 0.73) | <0.001 |
| Nulliparity:Hispanic origin                         | 0.85 (0.84 - 0.86) | <0.001 |
| Nulliparity:Tobacco smoke                           | 0.8 (0.79 - 0.82)  | <0.001 |
| Nulliparity:Neonatal female sex                     | 1.03 (1.02 - 1.04) | <0.001 |
| Nulliparity:Gestational age >40 weeks               | 0.86 (0.85 - 0.88) | <0.001 |
| Nulliparity:Birth weight (MoM) <0.9 MoM             | 0.83 (0.82 - 0.84) | <0.001 |
| Nulliparity:Birth weight (MoM) >1.07 MoM            | 1.01 (1 - 1.03)    | 0.028  |
| Nulliparity:OST                                     | 0.76 (0.72 - 0.8)  | <0.001 |
| Nulliparity:ART                                     | 0.69 (0.67 - 0.72) | <0.001 |
| Black (only) race:Hispanic origin                   | 1.32 (1.29 - 1.35) | <0.001 |
| Black (only) race:Tobacco smoke                     | 0.92 (0.9 - 0.94)  | <0.001 |
| Black (only) race:Previous CD                       | 0.98 (0.96 - 0.99) | 0.007  |
| Black (only) race:Neonatal female sex               | 0.94 (0.93 - 0.96) | <0.001 |
| Black (only) race:Birth weight (MoM) <0.9 MoM       | 0.98 (0.97 - 1)    | 0.011  |
| Black (only) race:Birth weight (MoM) >1.07 MoM      | 1.19 (1.17 - 1.21) | <0.001 |
| Black (only) race:OST                               | 1.18 (1.05 - 1.32) | 0.004  |
| Black (only) race:ART                               | 1.26 (1.16 - 1.36) | <0.001 |
| Hispanic origin:Tobacco smoke                       | 1.11 (1.07 - 1.14) | <0.001 |
| Hispanic origin:Previous CD                         | 0.98 (0.96 - 0.99) | <0.001 |
| Hispanic origin:Neonatal female sex                 | 0.95 (0.94 - 0.96) | <0.001 |
| Hispanic origin:Gestational age >40 weeks           | 1.18 (1.16 - 1.21) | <0.001 |
| Hispanic origin:Birth weight (MoM) <0.9 MoM         | 0.98 (0.96 - 0.99) | <0.001 |
| Hispanic origin:Birth weight (MoM) >1.07 MoM        | 1.13 (1.11 - 1.14) | <0.001 |
| Hispanic origin:OST                                 | 1.24 (1.14 - 1.34) | <0.001 |
| Hispanic origin:ART                                 | 1.1 (1.03 - 1.17)  | 0.004  |
| Tobacco smoke:Previous CD                           | 0.87 (0.85 - 0.89) | <0.001 |

|                                                        |                    |        |
|--------------------------------------------------------|--------------------|--------|
| Tobacco smoke:Neonatal female sex                      | 1.02 (1 - 1.03)    | 0.03   |
| Tobacco smoke:Gestational age >40 weeks                | 1.14 (1.1 - 1.17)  | <0.001 |
| Tobacco smoke:Birth weight (MoM) <0.9 MoM              | 0.97 (0.95 - 0.99) | <0.001 |
| Tobacco smoke:Birth weight (MoM) >1.07 MoM             | 1.12 (1.1 - 1.14)  | <0.001 |
| Tobacco smoke:OST                                      | 0.8 (0.65 - 0.98)  | 0.035  |
| Tobacco smoke:ART                                      | 0.62 (0.47 - 0.81) | <0.001 |
| Previous CD:Neonatal female sex                        | 0.97 (0.95 - 0.98) | <0.001 |
| Previous CD:Gestational age >40 weeks                  | 1.33 (1.3 - 1.36)  | <0.001 |
| Previous CD:Birth weight (MoM) <0.9 MoM                | 0.95 (0.94 - 0.96) | <0.001 |
| Previous CD:Birth weight (MoM) >1.07 MoM               | 0.97 (0.96 - 0.99) | <0.001 |
| Previous CD:OST                                        | 0.76 (0.71 - 0.83) | <0.001 |
| Previous CD:ART                                        | 0.69 (0.65 - 0.72) | <0.001 |
| Neonatal female sex:Birth weight (MoM) <0.9 MoM        | 0.99 (0.98 - 1)    | 0.062  |
| Neonatal female sex:Birth weight (MoM) >1.07 MoM       | 0.96 (0.95 - 0.97) | <0.001 |
| Gestational age >40 weeks:Birth weight (MoM) <0.9 MoM  | 1.13 (1.11 - 1.15) | <0.001 |
| Gestational age >40 weeks:Birth weight (MoM) >1.07 MoM | 0.92 (0.88 - 0.95) | <0.001 |
| Gestational age >40 weeks:OST                          | 0.84 (0.75 - 0.93) | <0.001 |

Missing values: (¶) 851640.

Acronyms: OST = other subfertility treatments; ART = assisted reproductive technologies; BMI = body mass index; CD = cesarean delivery; MoM = multiple of the median.
