# Supplementary material for: Assisted Reproductive Technology and Breech Delivery: A Nationwide Cohort Study in Singleton Pregnancies
Source: MDPI journal article supplement (doi:10.3390/jpm13071144), 2023-07-16

**Figure S2-** This plot shows the birth weight MoM time trend in 154’395 OST pregnancies stratified per fetal presentation at delivery (breech vs. others) among the study years.

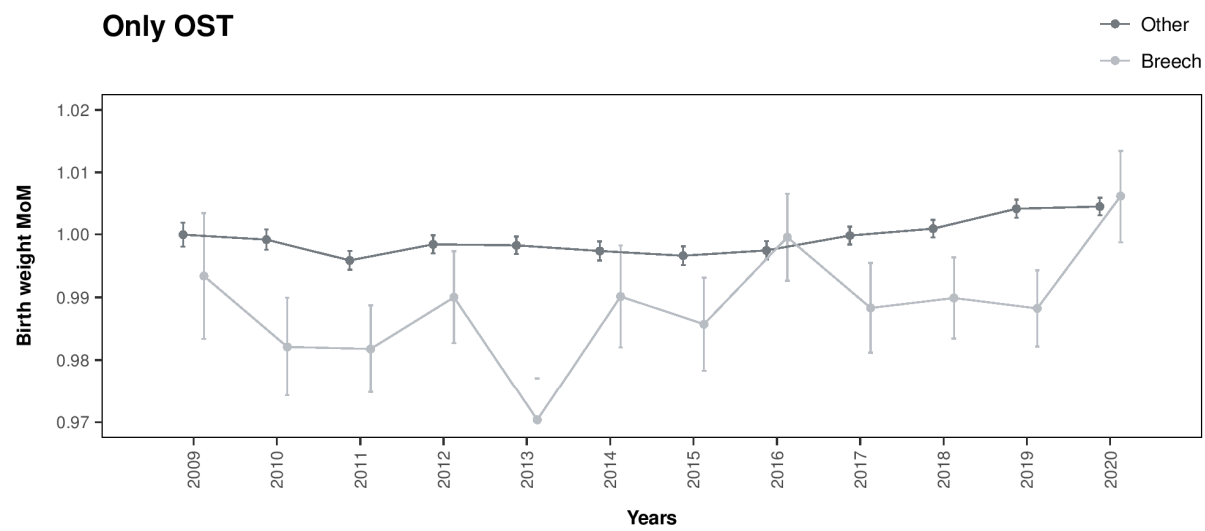

Supplement: s1 [file s1]
